# Supplementary material for: Integrated Analysis of Cortex Single-Cell Transcriptome and Serum Proteome Reveals the Novel Biomarkers in Alzheimer’s Disease
Source: MDPI journal article supplement (doi:10.3390/brainsci12081022), 2022-08-01
Supplement: s1 [file s1]

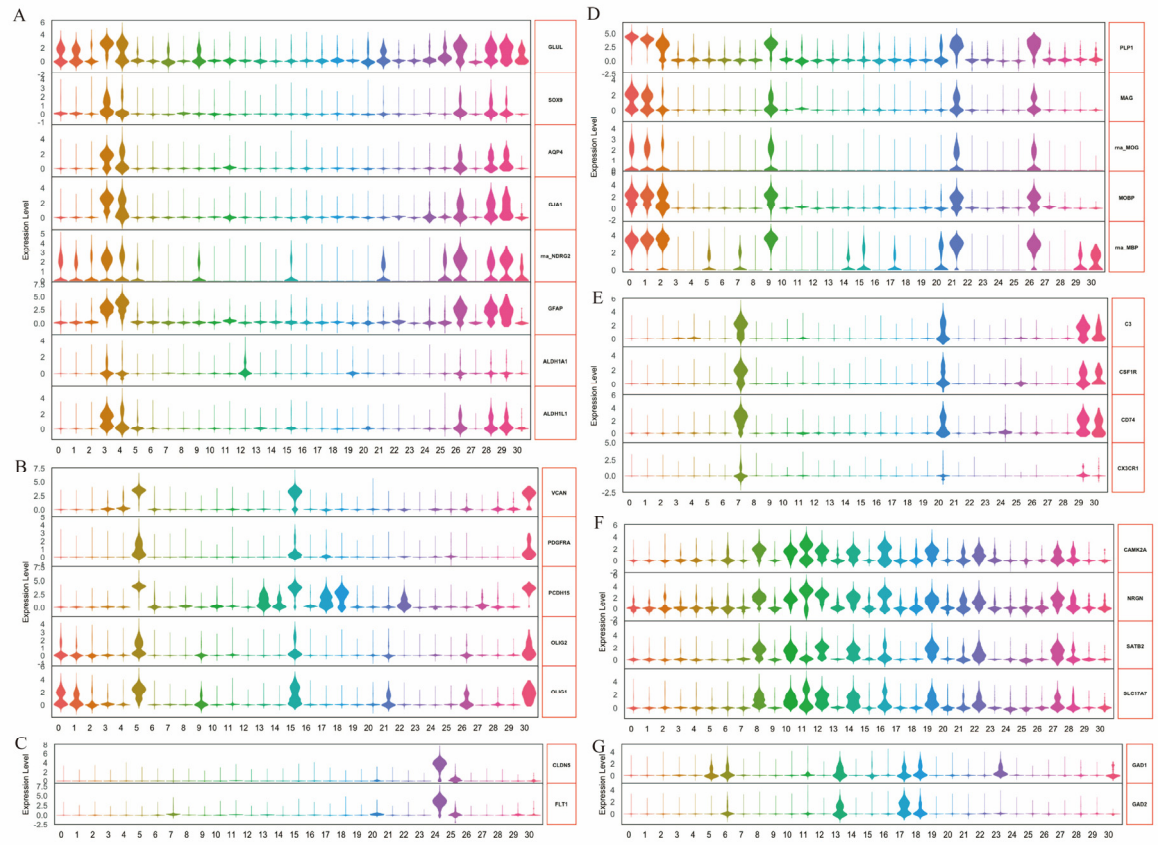

Figure S1. Expression levels of cell-type classical marker genes in all clusters.

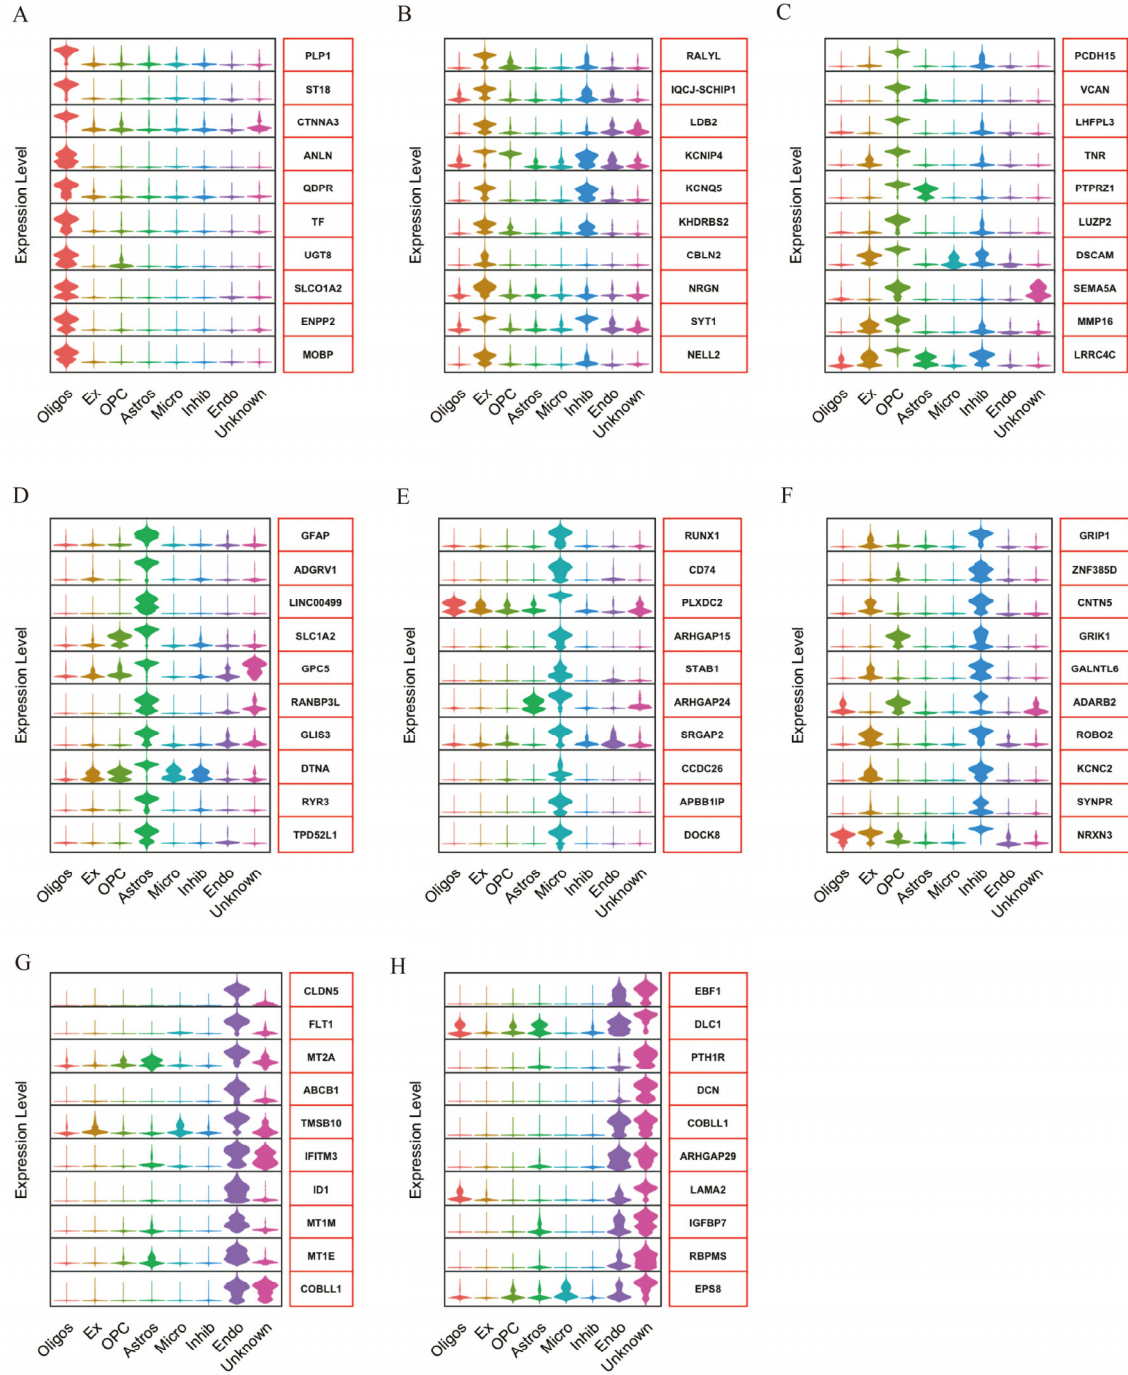

Figure S2. Specific differentially expressed genes expression levels of all cells in 8 cell types.
